# Supplementary material
Source: Springer Nature journal article supplement (https://www.springermedizin.de/resource/supplementary/13023_2011_319_MOESM6_ESM.pdf/9642088)

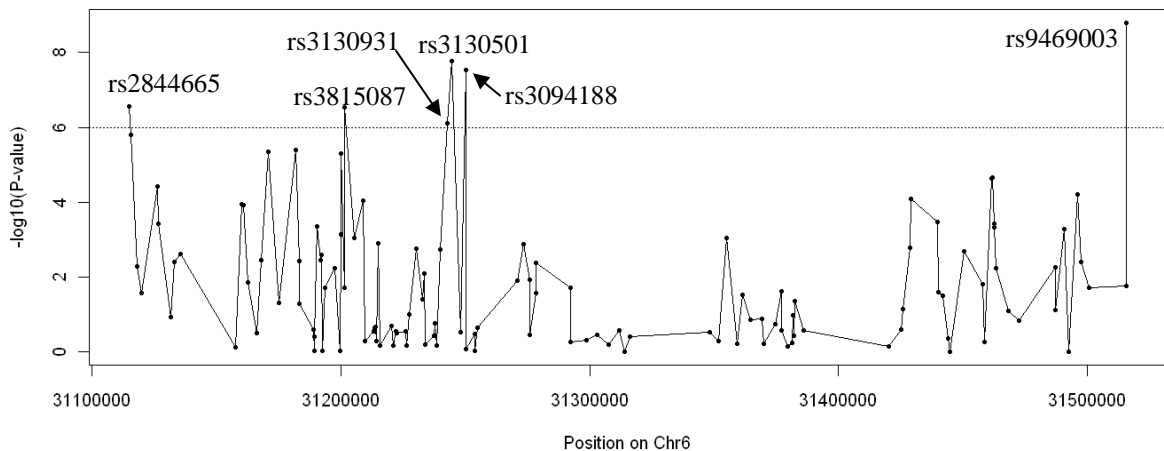

A

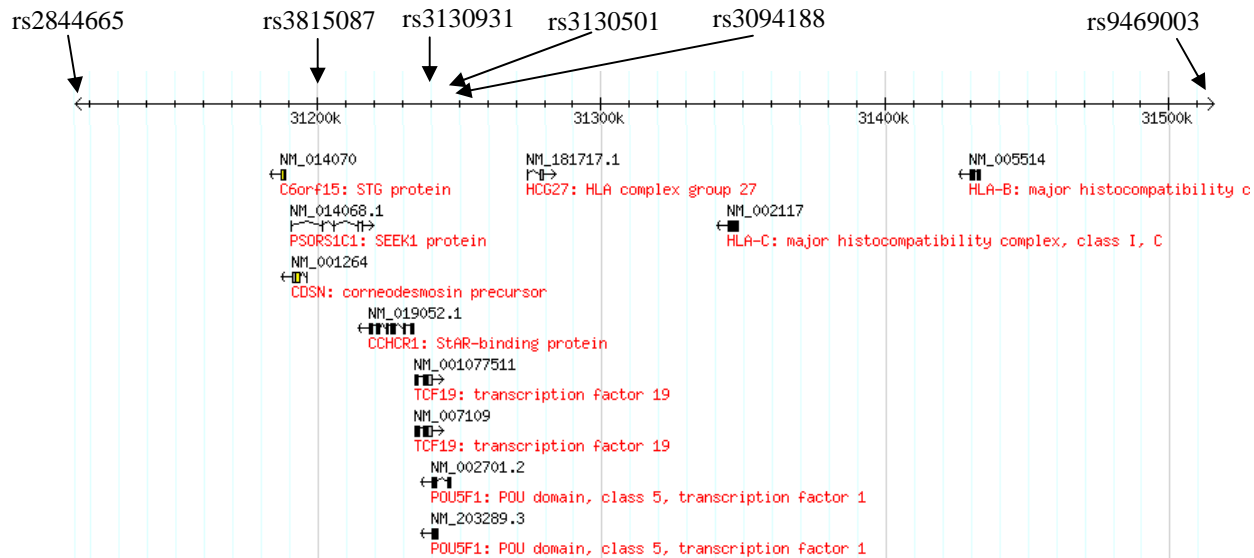

B

Supplement: MOESM6 [file 9642088]
